# Supplementary material for: Effects of UV-B Radiation on the Content of Bioactive Components and the Antioxidant Activity of Prunella vulgaris L. Spica during Development
Source: MDPI journal article supplement (doi:10.3390/molecules23050989), 2018-04-24
Supplement: s1 [file s1]

**Table 1.** The DPPH<sup>•</sup> and ABTS<sup>•+</sup> radical scavenging activities in the ethanol extracts of *P. vulgaris* spicas at the three developmental stages under the control and UV-B treatments.

| Antioxidant index                  | UV-B dosage<br>( $\mu\text{W cm}^{-2} \text{ nm}^{-1}$ ) | Bud stage           | Full-flowering      | Mature-fruitle      |
|------------------------------------|----------------------------------------------------------|---------------------|---------------------|---------------------|
| DPPH <sup>•</sup> (%)              | 0                                                        | 90.41 $\pm$ 0.23 aA | 91.24 $\pm$ 0.10 aA | 74.36 $\pm$ 2.90 aB |
|                                    | 120                                                      | 90.35 $\pm$ 0.83 aA | 88.61 $\pm$ 0.34 bA | 70.49 $\pm$ 2.62 aB |
| TEAC (mmol L <sup>-1</sup> Trolox) | 0                                                        | 1.31 $\pm$ 0.01 aA  | 1.35 $\pm$ 0.02 aA  | 0.80 $\pm$ 0.05 bB  |
|                                    | 120                                                      | 1.13 $\pm$ 0.05 bB  | 1.33 $\pm$ 0.05 aA  | 1.00 $\pm$ 0.02 aC  |

Each value is presented as the mean  $\pm$  SD (n = 3). Different lower-case letters indicate significant differences between the CK and UV-B treatments, and different capital letters indicate significant differences between the three developmental stages of *P. vulgaris* ( $p < 0.05$ ).
