# Supplementary material for: Effects of UV-B Radiation on the Content of Bioactive Components and the Antioxidant Activity of Prunella vulgaris L. Spica during Development
Source: MDPI journal article supplement (doi:10.3390/molecules23050989), 2018-04-24
Supplement: s1 [file s1]

**Table 2.** Correlation analysis between the contents of the bioactive compounds and the DPPH• and ABTS•+ radical scavenging activities of the ethanol extracts of *P. vulgaris* spicas at three developmental stages of under the control and UV-B treatments

| Antioxidant index                  | UV-B dose<br>( $\mu\text{W cm}^{-2} \text{ nm}^{-1}$ ) | Rosmarinic acid<br>(%) | Caffeic acid<br>(%) | Hyperoside<br>(%) | Salviaflaside<br>(%) | Total flavonoids<br>(%) |
|------------------------------------|--------------------------------------------------------|------------------------|---------------------|-------------------|----------------------|-------------------------|
| DPPH• (%)                          | 0                                                      | 0.993*                 | 0.727               | 0.967             | -0.999*              | 0.999*                  |
|                                    | 120                                                    | 0.187                  | 0.189               | 0.229             | 0.312                | 0.999*                  |
| TEAC (mmol L <sup>-1</sup> Trolox) | 0                                                      | 0.191                  | 0.202               | 0.244             | 0.334                | 0.999*                  |
|                                    | 120                                                    | 0.132                  | 0.136               | 0.163             | 0.224                | 0.720                   |

\* The level of significance is indicated as follows:  $0.01 < p < 0.05$ .
