# Supplementary material for: Effects of UV-B Radiation on the Content of Bioactive Components and the Antioxidant Activity of Prunella vulgaris L. Spica during Development
Source: MDPI journal article supplement (doi:10.3390/molecules23050989), 2018-04-24
Supplement: s1 [file s1]

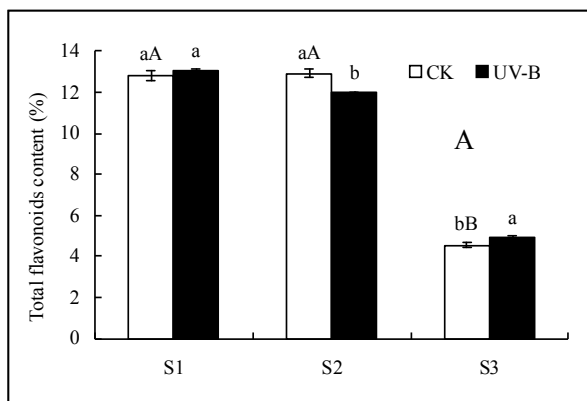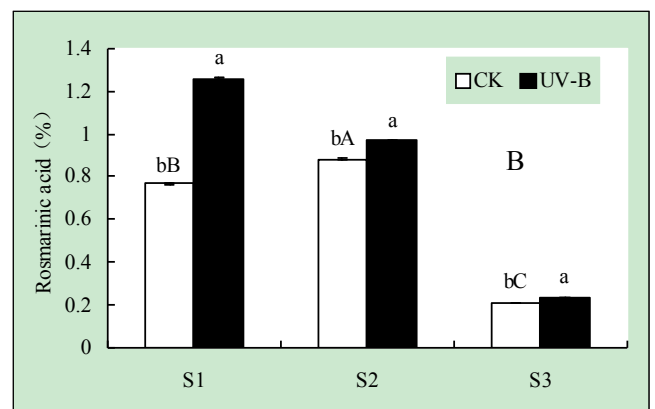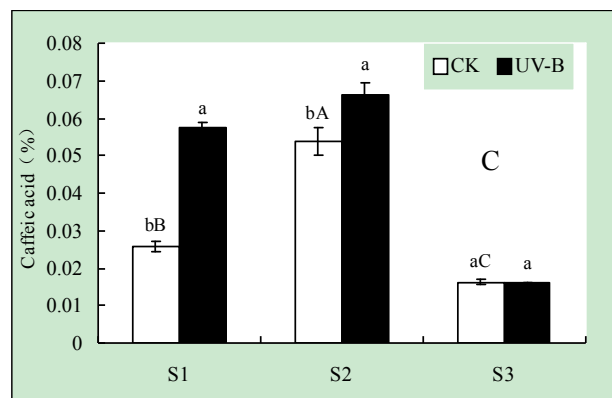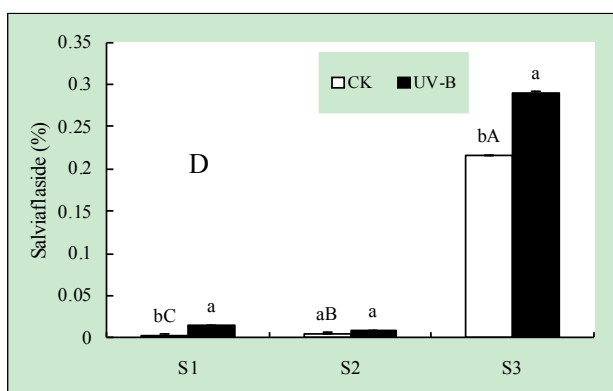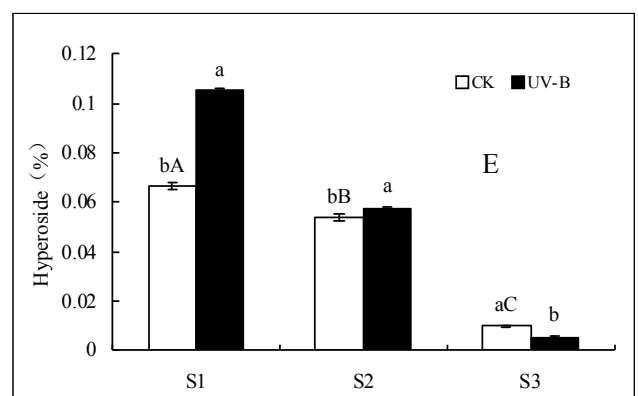

**Figure 1.** Effects of UV-B radiation on the contents of total flavonoids (A), rosmarinic acid (B), caffeic acid (C), salviaflaside (D) and hyperoside (E) in *P. vulgaris* spicas in three

developmental stages. CK:  $0 \mu\text{W cm}^{-2} \text{ nm}^{-1}$ ; UV-B:  $120 \mu\text{W cm}^{-2} \text{ nm}^{-1}$ ; S1, the bud stage; S2 the full-flowering stage; and S3, the mature-fruiting stage. Different lower-case letters indicate significant differences between CK treatments and UV-B treatments, and different capital letters indicate significant differences between the three developmental stages of *P. vulgaris* ( $p < 0.05$ ).
