# Supplementary material for: Effects of UV-B Radiation on the Content of Bioactive Components and the Antioxidant Activity of Prunella vulgaris L. Spica during Development
Source: MDPI journal article supplement (doi:10.3390/molecules23050989), 2018-04-24
Supplement: s1 [file s1]

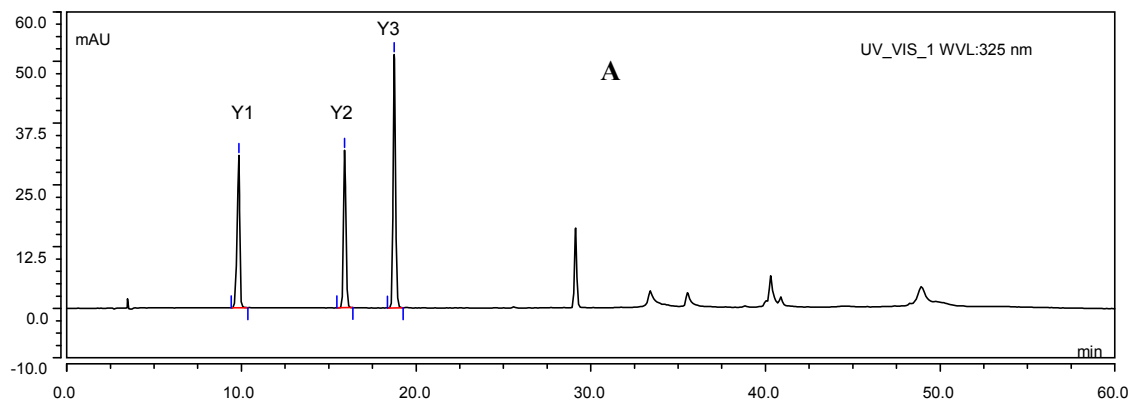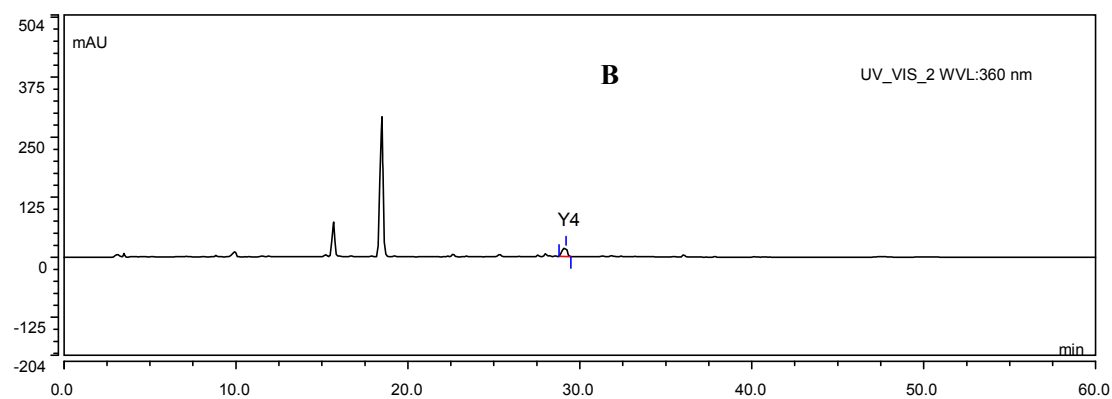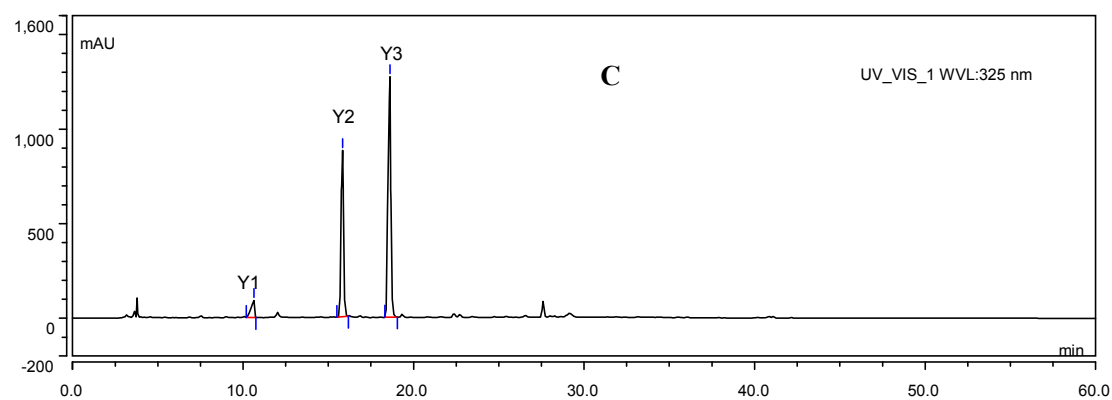

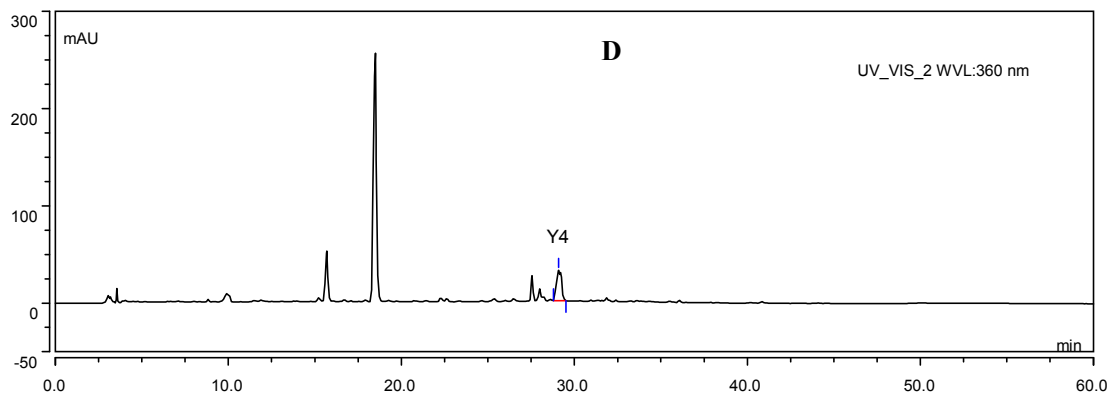

**Figure 3.** HPLC chromatograms of authentic standards and the methanol extract of *P. vulgaris* spicas. (A-B) UV chromatograms of the 4 authentic standards at 325 nm and 360 nm. (C-D) UV chromatograms of methanol extract at 325 nm and 360 nm. (1) caffeic acid (Y1); (2) salviaflaside (Y2); (3) rosmarinic acid (Y3); and (4) hyperoside (Y4).
