# Supplementary material for: Effects of UV-B Radiation on the Content of Bioactive Components and the Antioxidant Activity of Prunella vulgaris L. Spica during Development
Source: MDPI journal article supplement (doi:10.3390/molecules23050989), 2018-04-24
Supplement: s1 [file s1]

**Table 3.** Calibration curves of 5 standard chemicals

| Standard chemicals | Regression equation    | $R^2$  | Linear range      |
|--------------------|------------------------|--------|-------------------|
| Total flavonoids   | $y = 0.5899x + 0.0199$ | 0.9999 | 0.00–2.00         |
| Rosmarinic acid    | $y = 39999x + 0.0031$  | 0.9999 | 0.000209–0.001045 |
| Caffeic acid       | $y = 49130x - 0.0422$  | 0.9999 | 0.000108–0.00054  |
| Salviaflaside      | $y = 23282x - 0.044$   | 0.9999 | 0.00022–0.0011    |
| Hyperoside         | $y = 33699x - 0.0094$  | 0.9999 | 0.00011–0.00055   |

y: peak area; x: concentration of chemicals ( $\text{mg mL}^{-1}$ ).
