# Supplementary material for: Effects of UV-B Radiation on the Content of Bioactive Components and the Antioxidant Activity of Prunella vulgaris L. Spica during Development
Source: MDPI journal article supplement (doi:10.3390/molecules23050989), 2018-04-24
Supplement: s1 [file s1]

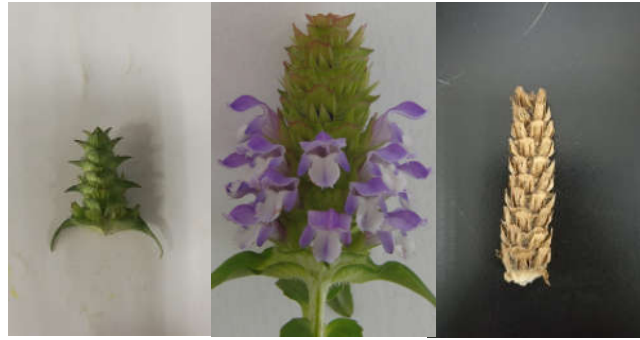

**Figure 2.** Spica development periods of *P. vulgaris* (from left to right: stage 1: bud stage, stage 2: full-flowering stage, and stage 3: mature-fruiting stage).
